# Supplementary material
Source: PubMed Central journal article supplement (PMC8118641)
Supplement: mmc1.pdf [file mmc1.pdf]

**Cell Reports, Volume 35**

**Supplemental information**

**SARS-CoV-2 genomic surveillance identifies  
naturally occurring truncation of ORF7a  
that limits immune suppression**

**Artem Nemudryi, Anna Nemudraia, Tanner Wiegand, Joseph Nichols, Deann T. Snyder, Jodi F. Hedges, Calvin Cicha, Helen Lee, Karl K. Vanderwood, Diane Bimczok, Mark A. Jutila, and Blake Wiedenheft**

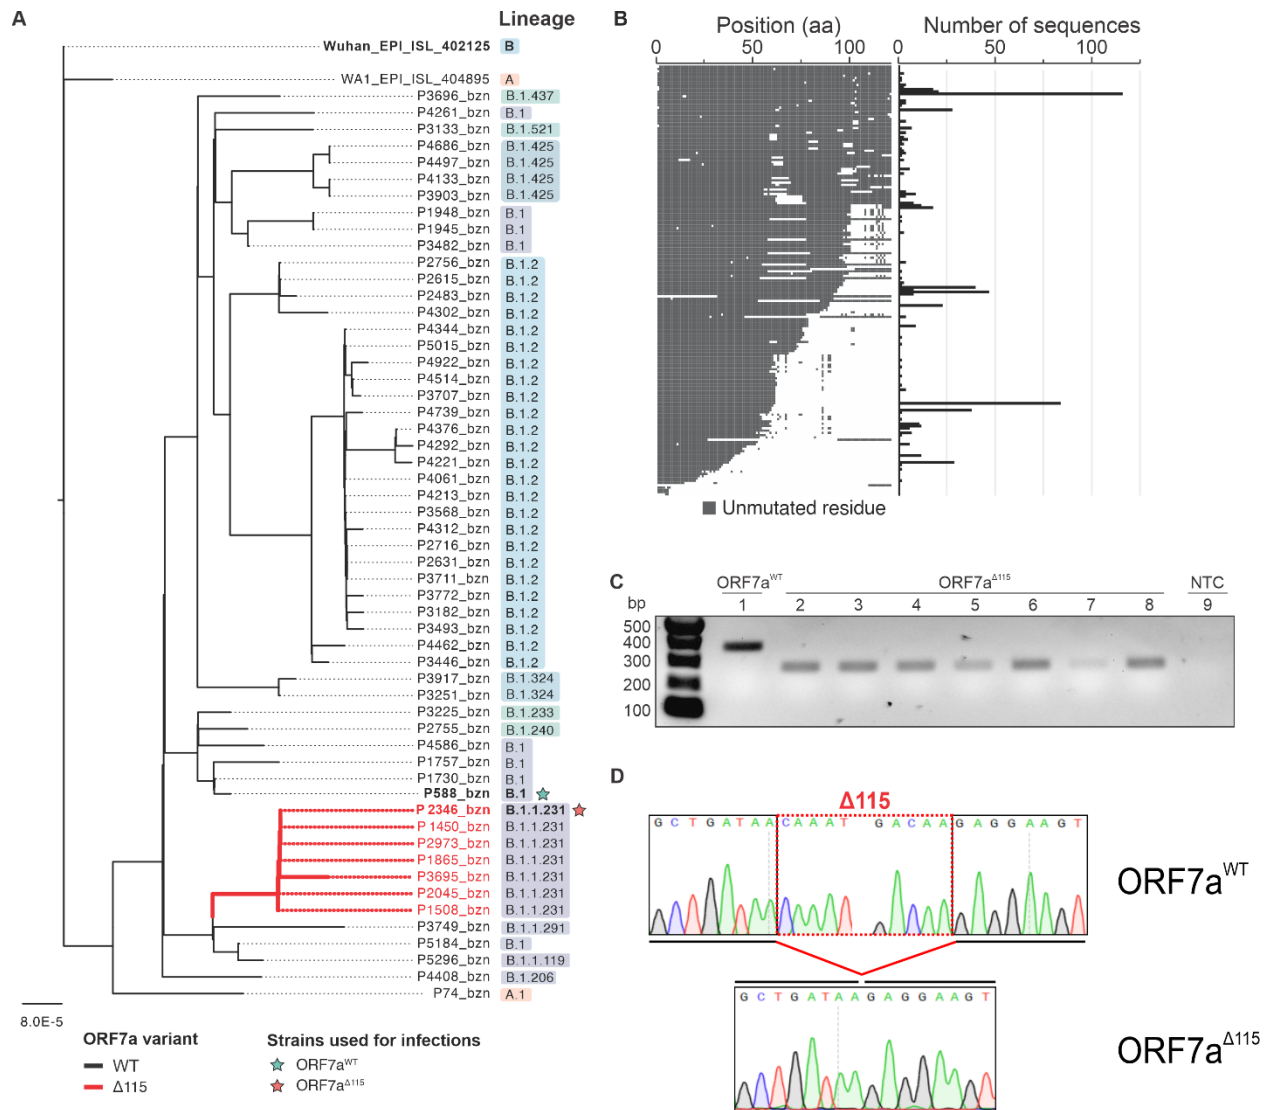

### Supplemental Figure S1, Phylogenetic and mutational analysis of ORF7a gene

**sequences. Related to main Figure 1. A)** A maximum-likelihood phylogenetic tree indicates that ORF7a<sup>Δ115</sup> strains form a monophyletic clade (red branches). Viral isolate P588 (teal star) was chosen as a "wildtype" control in our experiments. This strain shares a recent common ancestor with the predominant ORF7a<sup>Δ115</sup> clade. SARS-CoV-2 lineages were assigned using pangolin utility (cov-lineages.org, (Rambaut, Andrew et al., 2020)). **B)** Alignment of unique ORF7a protein sequences with five or more mutations as compared to the SARS-CoV-2 reference strain (Wuhan-Hu-1). Conserved residues are depicted in gray, while mutations and deletions are shown in white. The frequency of each genotype is shown on the right. **C)** RT-PCR with primers targeting regions that flank the ORF7a Δ115 deletion sampled in Bozeman, MT. **D)** All PCR products in (C) were Sanger sequenced. Representative sequencing chromatograms are shown. Deleted region is shown with dotted red box.

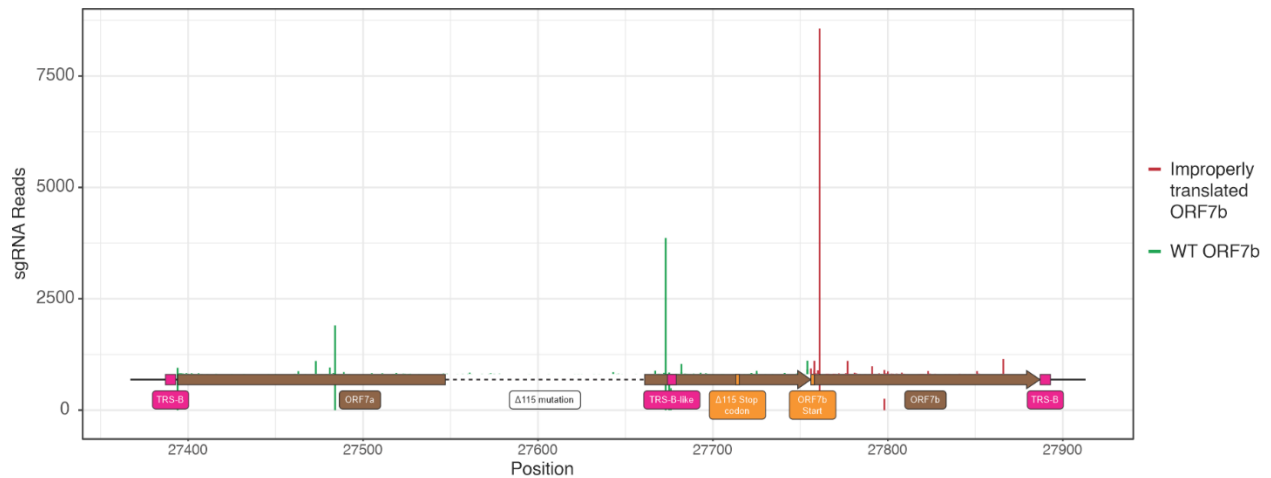

**Supplemental Figure S2, Mapping TRS-B sites required for ORF7a and ORF7b discontinuous sgRNA transcription. Related to Main Figure 2F-H.** Direct RNA sequencing data published by Kim et al was used to map TRS-B sites in SARS-CoV-2 ORF7a and ORF7b genes (Kim et al., 2020). Vertical lines indicate number of reads spanning the junction between TRS-L and “body” of the gene. Dashed line indicate region deleted in ORF7a<sup>Δ115</sup> strain. The deletion does not remove any of the mapped TRS-B sites suggesting that it has not affected ORF7b sgRNA transcription.

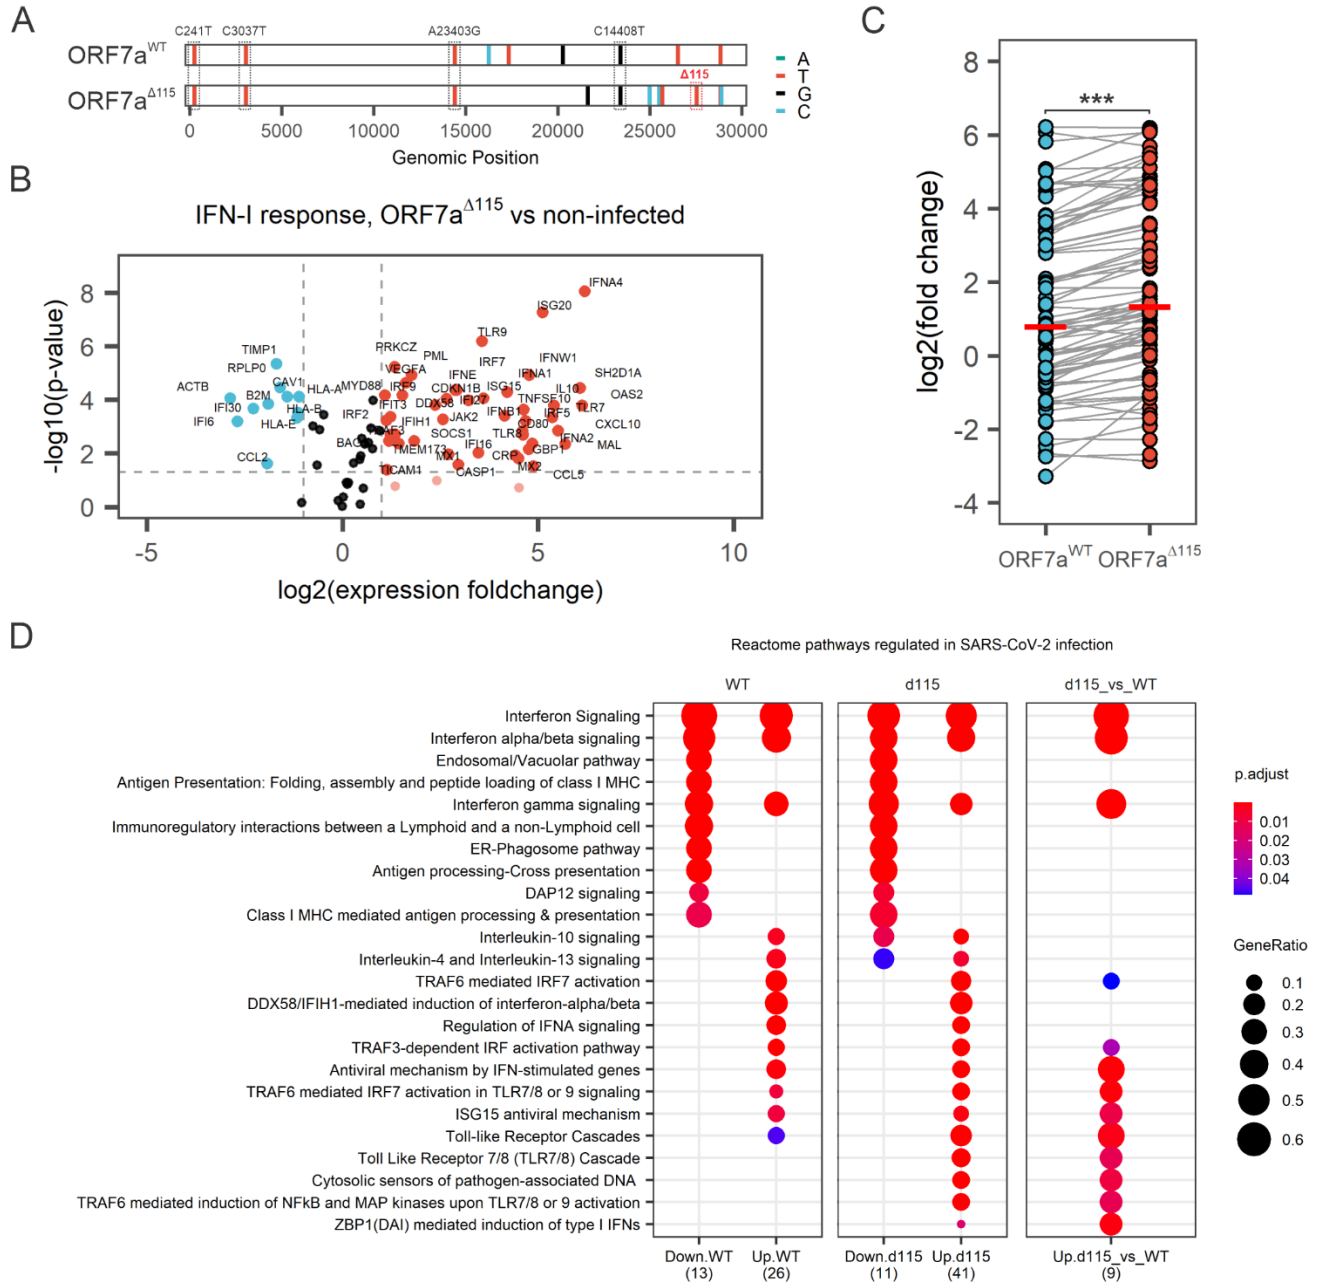

**Supplemental Figure S3, Related to Main Figure 3. IFN-I response and gene set enrichment analysis. A)** Genome sequences of ORF7a<sup>WT</sup> and ORF7a<sup>Δ115</sup> are compared to Wuhan-Hu-1 reference sequence. Colored lines mark differences to reference genome. Mutations that define haplotype of B.1 SARS-CoV-2 lineage are boxed. There are 11 nucleotide positions that differ between WT and Δ115 and are outside ORF7a. Seven of these SNVs change amino acid. In ORF7a<sup>WT</sup>: S194L in N protein and L1286F in ORF1ab. In ORF7a<sup>Δ115</sup>: R195I, R203K, G204K in N protein; Q38P and L95I in ORF3a. **B)** Volcano plot depicting IFN-I response in HEK 293T-hACE2 cells infected with ORF7a<sup>Δ115</sup> SARS-CoV-2 strain at MOI = 0.05. RNA was extracted from infected cells 24 hpi and reverse transcribed. Expression of IFN-I response genes was studied using RT-qPCR array targeting 91 human transcripts (88 targets

and 3 references). Experiment was performed in 3 biological replicates. Dashed lines show regulation ( $\geq 2$ -fold) and statistical significance thresholds ( $p$ -value  $< 0.05$ ). Each dot represents mean ( $n = 3$ ) normalized expression of a single gene relative to non-infected host. Genes that passed the threshold are labeled. **C**) Plot showing distribution of  $\log_2(\text{expression fold change})$  values in ORF7a<sup>WT</sup> and ORF7a <sup>$\Delta$ 115</sup> infection vs non-infected control. Each dot represents relative normalized expression for one transcript targeted with the RT-qPCR array. Gray lines connect values for the same transcript in the infection with ORF7a<sup>WT</sup> and ORF7a <sup>$\Delta$ 115</sup> variants. Horizontal red bar shows median value. Median ISG activation between two infections was compared using Wilcoxon signed-rank test (\*\*\*,  $p$ -value  $< 0.001$ ) **D**) List of IFN-I response genes that were significantly regulated ( $p$ -value  $< 0.05$ ,  $\geq 2$ -fold change in expression) upon infection with ORF7a <sup>$\Delta$ 115</sup> and ORF7a<sup>WT</sup> (vs non-infected control) were analyzed for enrichment of associated Reactome Pathways (Jassal et al., 2019; Zhou, Z. et al., 2020). Gene set enrichment analysis (GSEA) was performed using clusterProfiler package in RStudio (Yu and He, 2016; Yu et al., 2012). *Down.WT* – genes downregulated during infection with ORF7a<sup>WT</sup>; *Up.WT* – genes upregulated during infection with ORF7a<sup>WT</sup>; *Down.d115* – Reactome pathways enriched in genes downregulated during infection with ORF7a <sup>$\Delta$ 115</sup>; *Up.d115* – genes upregulated during infection with ORF7a <sup>$\Delta$ 115</sup>. *Up.d115\_vs\_WT* – Reactome pathways enriched in genes upregulated during infection with ORF7a <sup>$\Delta$ 115</sup> vs ORF7a<sup>WT</sup> (**Figure 3E**).
